# Supplementary material for: Prospective assessment of catheter-associated bacteriuria clinical presentation, epidemiology, and colonization dynamics in nursing home residents
Source: JCI journal article supplement (doi:10.1172/jci.insight.144775), 2021-09-02
Supplement: sd2 [file 2]

You are being redirected.
